# Supplementary material for: Solubilization of polycyclic aromatic hydrocarbons by novel biodegradable cationic gemini surfactant ethane-1,2-diyl bis(N,N-dimethyl-N-hexadecylammoniumacetoxy) dichloride and its binary mixtures with conventional surfactants
Source: Royal Society of Chemistry journal article supplement (doi:10.1039/c2sm26926k), 2012-12-04
Supplement: c2sm26926k.pdf [file c2sm26926k.pdf]

“Supplementary Information”

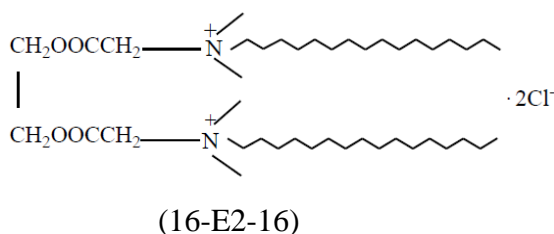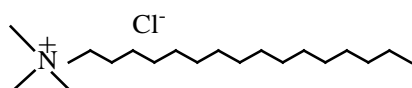

(CTAC)

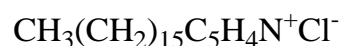

(CPC)

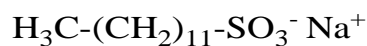

(SDS)

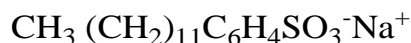

(SDBS)

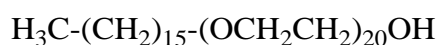

(Brij 58)

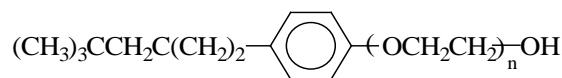

(TX-100)

**Scheme S2.** Structure of surfactant molecules used in this study: Ethane-1,2-diyl bis(*N,N*-dimethyl-*N*-hexadecylammoniumacetoxymethyl) dichloride (16-E2-16), Hexadecyltrimethylammonium Chloride (CTAC), Cetylpyridinium Chloride (CPC), Sodium dodecyl sulfate (SDS), Sodium dodecyl benzene sulfonate (SDBS), Polyoxyethylene (20) cetyl ether (Brij 58), *t*-octylphenoxypolyoxyethanol (TX-100)

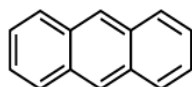

Anthracene

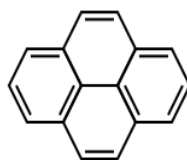

Pyrene

Molecular weight: 178.2

202.3

Solubility (mol/L):  $2.53 \times 10^{-7}$

$6.57 \times 10^{-7}$

log  $K_{ow}$ : 4.54

5.18

Molar volume ( $\text{\AA}^3$ ): 157.6

161.9

**Scheme S2.** Structure and properties of polycyclic aromatic hydrocarbons

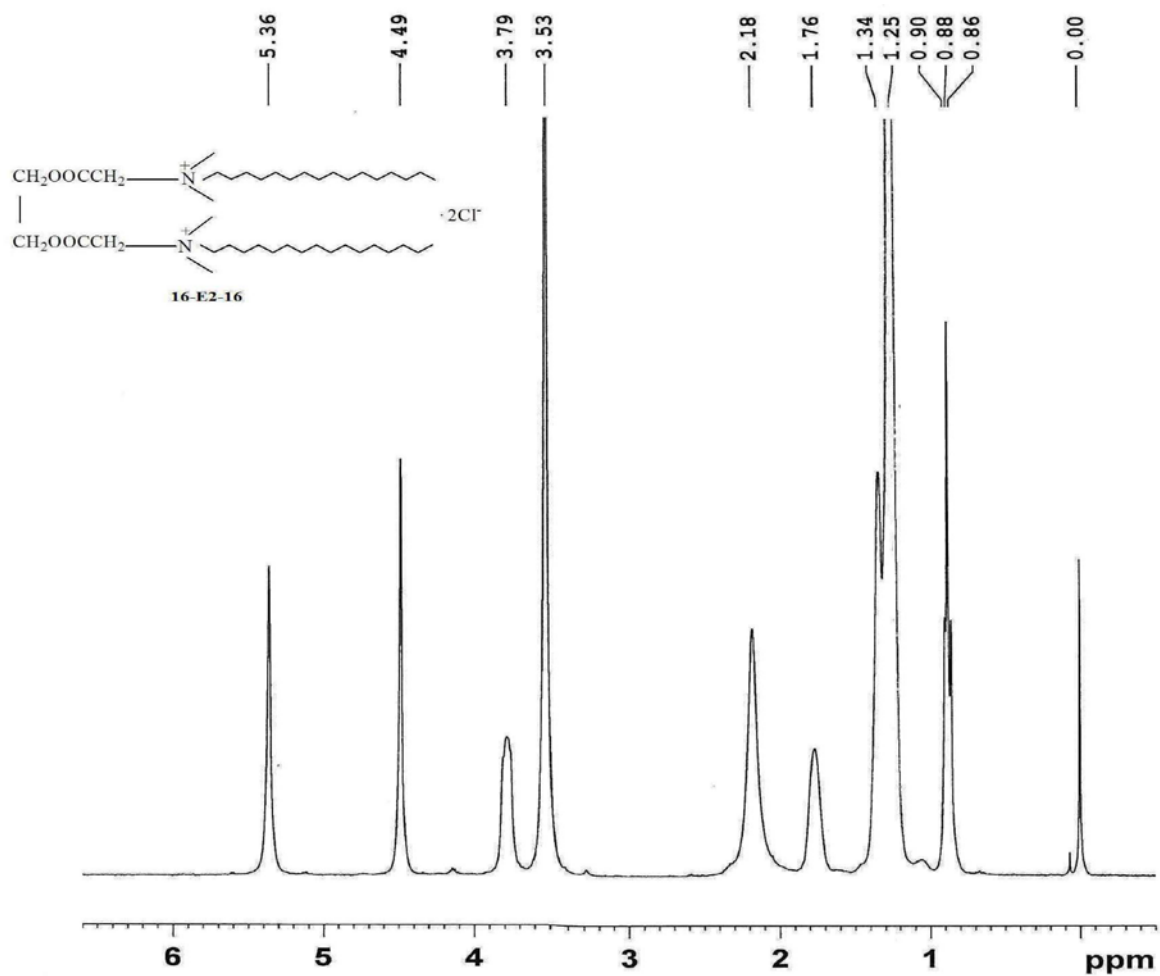

**Fig. S1 (A).** <sup>1</sup>H-NMR spectrum (300MHz) of Ethane-1,2-diyl bis(*N,N*-dimethyl-*N*-hexadecylammoniumacetoxo) dichloride (16-E2-16) in CDCl<sub>3</sub>.

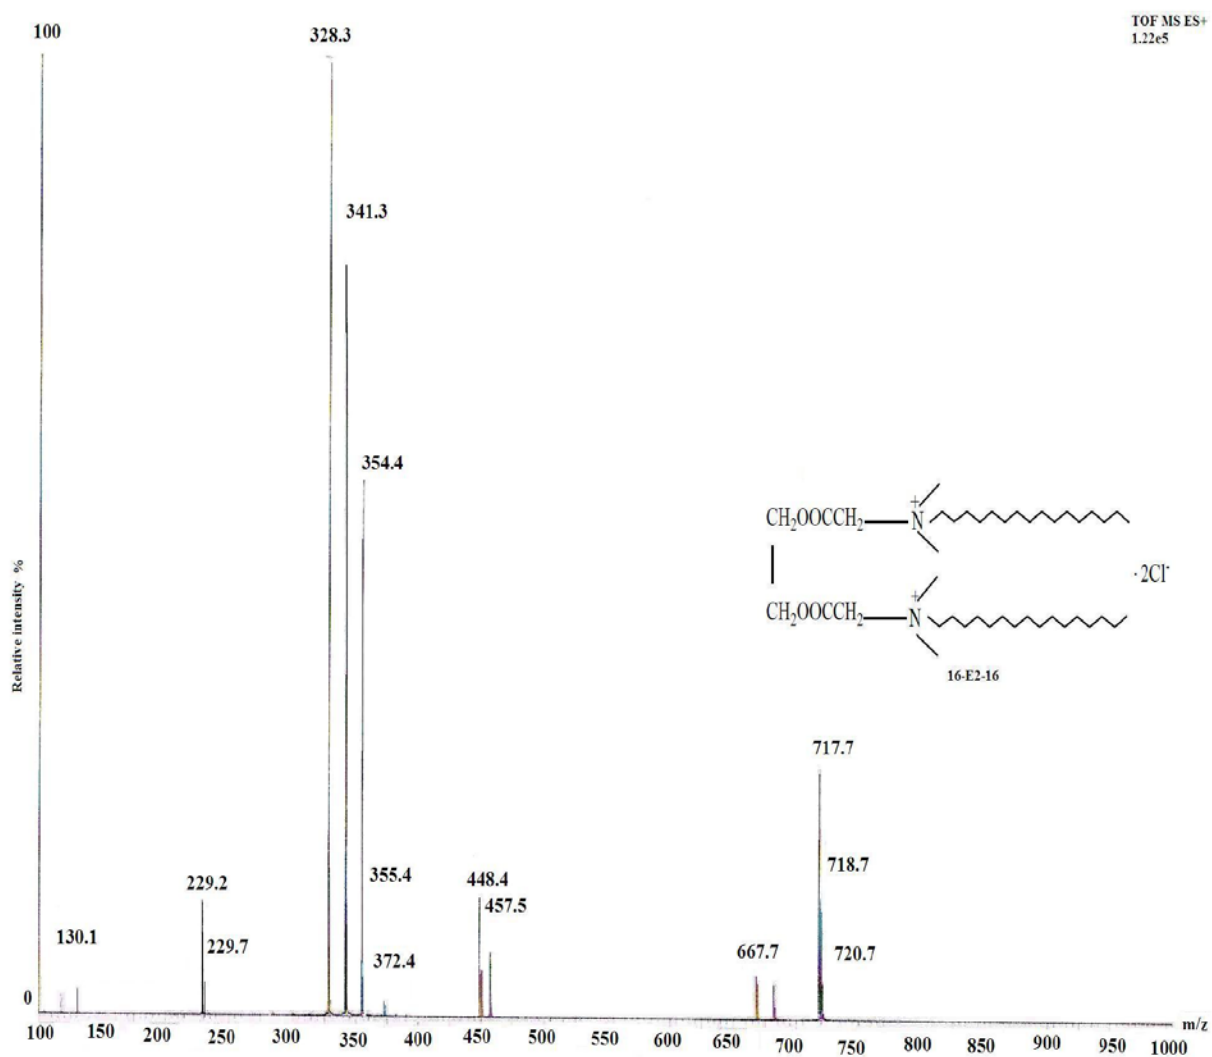

**Fig. S1(B).** MS-ESI (+) spectrum (relative intensity vs. m/z) of Ethane-1,2-diyl bis(*N,N* dimethyl-*N*-hexadecylammoniumacetoxo) dichloride (16-E2-16).

**Table S1** Physicochemical parameters evaluated with the average conductometric and tensiometric cmc values determined at 30 °C

| <i>System</i>    | $X_1^m$ | $X_1^{ideal}$ | $f_1^m$ | $f_2^m$ | $\Delta G_{ex}^m$<br>( $kJmol^{-1}$ ) |
|------------------|---------|---------------|---------|---------|---------------------------------------|
| 16-E2-16         |         |               |         |         |                                       |
| CPC              |         |               |         |         |                                       |
| CTAC             |         |               |         |         |                                       |
| SDS              |         |               |         |         |                                       |
| SDBS             |         |               |         |         |                                       |
| Brij 58          |         |               |         |         |                                       |
| TX-100           |         |               |         |         |                                       |
| 16-E2-16+CPC     | 0.7899  | 0.9983        | 0.6788  | 0.0041  | -3.668                                |
| 16-E2-16+ CTAC   | 0.7932  | 0.9988        | 0.6714  | 0.0028  | -3.848                                |
| 16-E2-16+SDS     | 0.8788  | 0.9998        | 0.8781  | 0.0010  | -2.372                                |
| 16-E2-16+SDBS    | 0.8742  | 0.9995        | 0.8869  | 0.0030  | -2.100                                |
| 16-E2-16+Brij 58 | 0.6856  | 0.7692        | 0.8931  | 0.5841  | -0.621                                |
| 16-E2-16+TX-100  | 0.7479  | 0.9923        | 0.6152  | 0.0139  | -3.630                                |

**Table S2** The Solubilization parameters  $\ln K_m$ ,  $\Delta G_s^0$ ,  $R$  and  $B$  for single and binary (1:1) surfactant systems

| <i>System</i>    | Anthracene |       |       |                                          | Pyrene    |       |       |                                          |
|------------------|------------|-------|-------|------------------------------------------|-----------|-------|-------|------------------------------------------|
|                  | $\ln K_m$  | $R$   | $B$   | $\Delta G_s^0$<br>(kJmol <sup>-1</sup> ) | $\ln K_m$ | $R$   | $B$   | $\Delta G_s^0$<br>(kJmol <sup>-1</sup> ) |
| 16-E2-16         | 12.64      |       |       | -31.86                                   | 15.01     |       |       | -37.83                                   |
| CPC              | 12.67      |       |       | -31.94                                   | 14.77     |       |       | -37.22                                   |
| CTAC             | 13.91      |       |       | -35.07                                   | 14.55     |       |       | -36.68                                   |
| SDS              | 12.22      |       |       | -30.80                                   | 12.77     |       |       | -32.19                                   |
| SDBS             | 12.01      |       |       | -30.27                                   | 9.99      |       |       | -25.20                                   |
| Brij 58          | 14.86      |       |       | -37.46                                   | 15.75     |       |       | -39.71                                   |
| TX-100           | 13.79      |       |       | -34.77                                   | 13.92     |       |       | -35.10                                   |
| 16-E2-16+CPC     | 14.80      | 4.30  | 15.41 | -35.57                                   | 15.11     | 1.251 | -0.52 | -38.09                                   |
| 16-E2-16+CTAC    | 14.02      | 0.86  | 9.22  | -33.58                                   | 14.11     | 0.486 | -4.20 | -35.56                                   |
| 16-E2-16+SDS     | 16.15      | 21.15 | 37.42 | -39.02                                   | 15.36     | 2.560 | 17.38 | -38.73                                   |
| 16-E2-16+SDBS    | 16.13      | 22.46 | 36.34 | -39.98                                   | 15.61     | 3.627 | 40.62 | -39.35                                   |
| 16-E2-16+Brij 58 | 15.43      | 1.61  | 12.34 | -37.18                                   | 16.62     | 3.168 | 3.78  | -41.91                                   |
| 16-E2-16+TX-100  | 14.05      | 0.978 | 7.99  | -33.66                                   | 14.18     | 0.876 | 4.33  | -35.74                                   |
